# Supplementary material for: Effect of ANKK1 Polymorphisms on Serum Valproic Acid Concentration in Chinese Han Adult Patients in the Early Postoperative Period
Source: PubMed Central journal article supplement — Neurol Ther. 2022 Nov 18;12(1):197–209. doi: 10.1007/s40120-022-00419-8 (PMC9837366; doi:10.1007/s40120-022-00419-8), 2022-11-18
Supplement: 40120_2022_419_MOESM1_ESM.pdf [file 40120_2022_419_MOESM1_ESM.pdf]

## *Neurology and Therapy*

# **Effect of *ANKKI* polymorphisms on serum valproic acid concentration in Chinese Han adult neurosurgery patients**

### **Author list**

Jiuhong Ma<sup>1\*</sup>, Xiuzhao Fan<sup>2\*</sup>, Xinfeng Cai<sup>3</sup>, Hongming Ji<sup>1</sup>, Yuanping Li<sup>4</sup>, Jinlin Guo<sup>4</sup>

### **Affiliations**

1. Department of Neurosurgery, Shanxi Provincial People's Hospital, Taiyuan, P.R.  
China
2. Department of Nephrology, Shanxi Provincial People's Hospital, Taiyuan, P.R.  
China
3. Department of Pharmacy, Shanxi Province Cancer Hospital / Shanxi Hospital  
Affiliated to Cancer Hospital, Chinese Academy of Medical Sciences/Cancer  
Hospital Affiliated to Shanxi Medical University, Taiyuan, P.R. China
4. Department of Pharmacy, Shanxi Provincial People's Hospital, Taiyuan, P.R.  
China

\* These authors contributed equally to this paper.

### **Corresponding Author**

Jinlin Guo

Address: Department of Pharmacy, Shanxi Provincial People's Hospital, Shuangtasi  
Street 59#, Taiyuan, Shanxi, P.R.China, 030012.

E-mail: taiggll@foxmail.com

Table 1 Genotype frequencies in the study population (n = 313)

| Genetic polymorphisms | Genotypes | Model building patients |                   |         |
|-----------------------|-----------|-------------------------|-------------------|---------|
|                       |           | Value (n)               | Frequency (%)     | HWE (P) |
| LEPR                  |           |                         |                   |         |
| rs1137101             | AA/GA/GG  | 233/72/8                | 74.44/23.00/2.56  | 0.50    |
| UGT2B7                |           |                         |                   |         |
| rs1223719             | GG/GT/TT  | 229/79/5                | 73.16/25.24/1.60  | 0.76    |
| rs7439366             | CC/TC/TT  | 130/146/37              | 41.53/46.64/11.82 | 0.80    |
| rs7668258             | CC/CT/TT  | 136/141/36              | 43.45/45.05/11.50 | 1       |
| CYP2C19               |           |                         |                   |         |
| rs12769205            | AA/GA/GG  | 170/115/28              | 54.31/36.74/8.95  | 0.23    |
| SCN2A                 |           |                         |                   |         |
| rs17183814            | AA/GA/GG  | 242/65/6                | 77.32/20.77/1.92  | 0.64    |
| ANKK1                 |           |                         |                   |         |
| rs1800497             | GG/AG/AA  | 121/138/54              | 38.66/44.09/17.25 | 0.21    |
| UGT1A6                |           |                         |                   |         |
| rs2070959             | AA/AG/GG  | 175/110/28              | 55.91/35.14/8.95  | 0.11    |
| rs28898617            | AA/AG/GG  | 296/16/1                | 94.57/5.11/0.32   | 0.44    |
| GABRA1                |           |                         |                   |         |
| rs2279020             | AA/GA/GG  | 113/136/64              | 36.10/43.45/20.45 | 0.07    |
| SCN1A                 |           |                         |                   |         |
| rs2298771             | CC/CT/TT  | 251/59/3                | 80.19/18.85/0.96  | 1       |
| CYP1A1                |           |                         |                   |         |
| rs2606345             | AA/CA/CC  | 268/42/3                | 85.62/13.42/0.96  | 0.53    |
| AMPK                  |           |                         |                   |         |
| rs10789038            | AA/AG/GG  | 200/98/15               | 63.90/31.31/4.79  | 0.59    |
| SH2B1                 |           |                         |                   |         |
| rs3888190             | AA/CA/CC  | 223/84/6                | 71.25/26.84/1.92  | 0.75    |
| CYP2C19*2             |           |                         |                   |         |
| rs4244285             | AA/GA/GG  | 175/111/27              | 55.91/35.46/8.63  | 0.16    |
| SOD2                  |           |                         |                   |         |
| rs4880                | AA/AG/GG  | 233/76/4                | 74.44/24.28/1.28  | 0.64    |
| CYP2C19*3             |           |                         |                   |         |
| rs4986893             | AA/GA/GG  | 293/19/1                | 93.61/6.07/0.32   | 0.59    |
